# Supplementary material for: Targeting ABCA12-controlled ceramide homeostasis inhibits breast cancer stem cell function and chemoresistance
Source: PubMed Central journal article supplement — Sci Adv. 2023 Dec 1;9(48):eadh1891. doi: 10.1126/sciadv.adh1891 (PMC10691781; doi:10.1126/sciadv.adh1891), 2023-12-01
Supplement: sciadv.adh1891_sm.pdf [file sciadv.adh1891_sm.pdf]

Supplementary Materials for  
**Targeting ABCA12-controlled ceramide homeostasis inhibits breast cancer  
stem cell function and chemoresistance**

Jihong Cui *et al.*

Corresponding author: Wenjun Guo, wenjun.guo@einsteinmed.edu; Jihong Cui, jihong.cui@einsteinmed.edu

*Sci. Adv.* **9**, eadh1891 (2023)  
DOI: 10.1126/sciadv.adh1891

**The PDF file includes:**

Figs. S1 to S7  
Table S1  
Data S1 and S2  
Legend for data S3

**Other Supplementary Material for this manuscript includes the following:**

Data S3

**Fig. S1.**

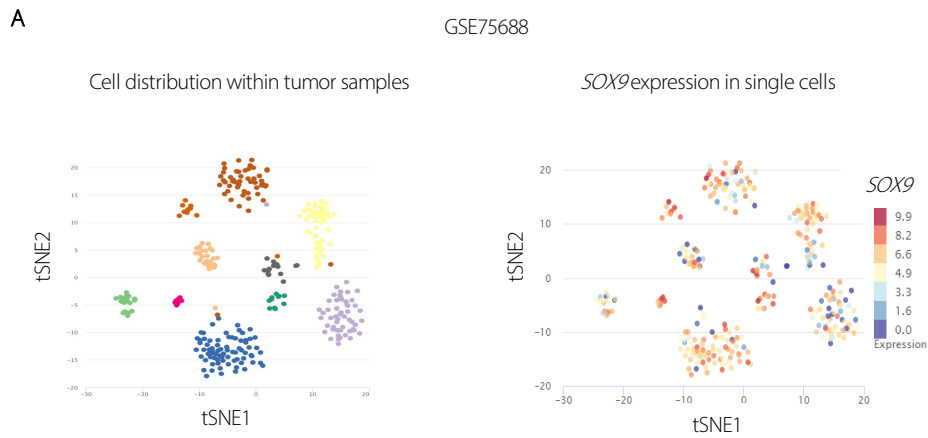

**Fig. S1: *SOX9* is expressed at heterogeneous levels in breast cancer cells.**

A. T-SNE plots of scRNA-seq data (GSE75688) showing the distribution of cancer cells according to tumor samples (left, each color represents one tumor sample) and *SOX9* mRNA levels in individual cells (right, expression levels were represented by heat map). Data were analyzed by using CancerSEA (ExpID: EXP0053)

**Fig. S2.**

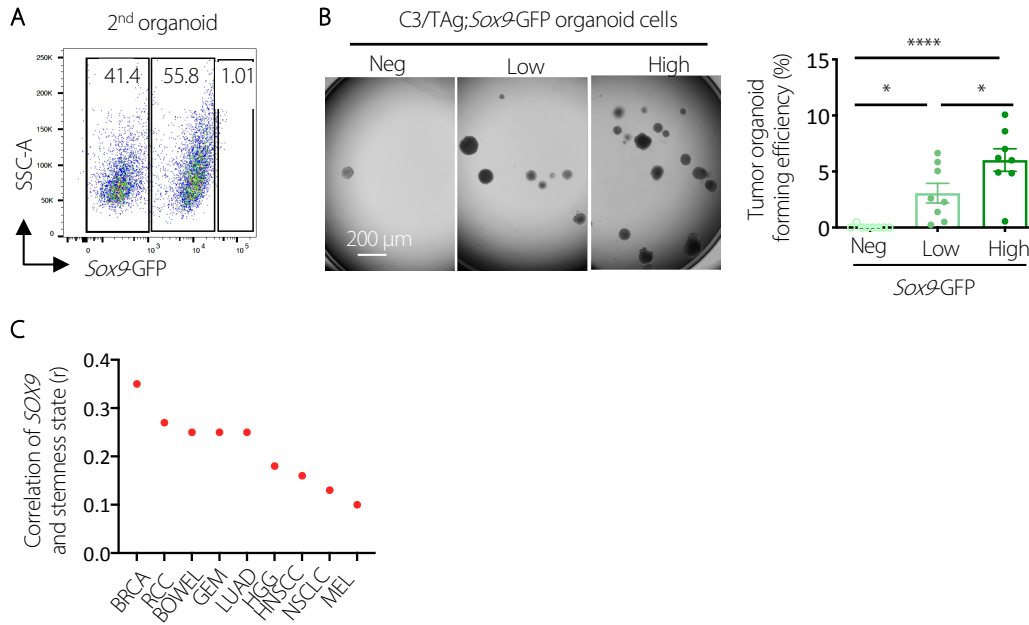

**Fig. S2. SOX9<sup>high</sup> cancer cells were enriched in tumorigenic potential.**

- Flow cytometry showing the distribution of *Sox9*-GFP<sup>neg</sup>, <sup>low</sup> and <sup>high</sup> cells in tumor organoids generated from C3/TAg;*Sox9*-GFP<sup>high</sup> tumor cells.
- Representative images and quantification of organoid forming efficiency of *Sox9*-GFP<sup>neg</sup>, <sup>low</sup> and <sup>high</sup> cells sorted from cultured *Sox9*-GFP;C3/Tag tumor organoids. Each dot represents one organoid line from a distinct tumor ( $n = 8$ ).
- Correlations between *SOX9* expression and the stemness score in different cancer types as determined by CancerSEA.

All data are represented as mean  $\pm$  SEM.  $P$  values were determined by one-way ANOVA with Tukey's test (B). \*\*\*\* $p < 0.0001$ ; \* $p < 0.05$ .

**Fig. S3.**

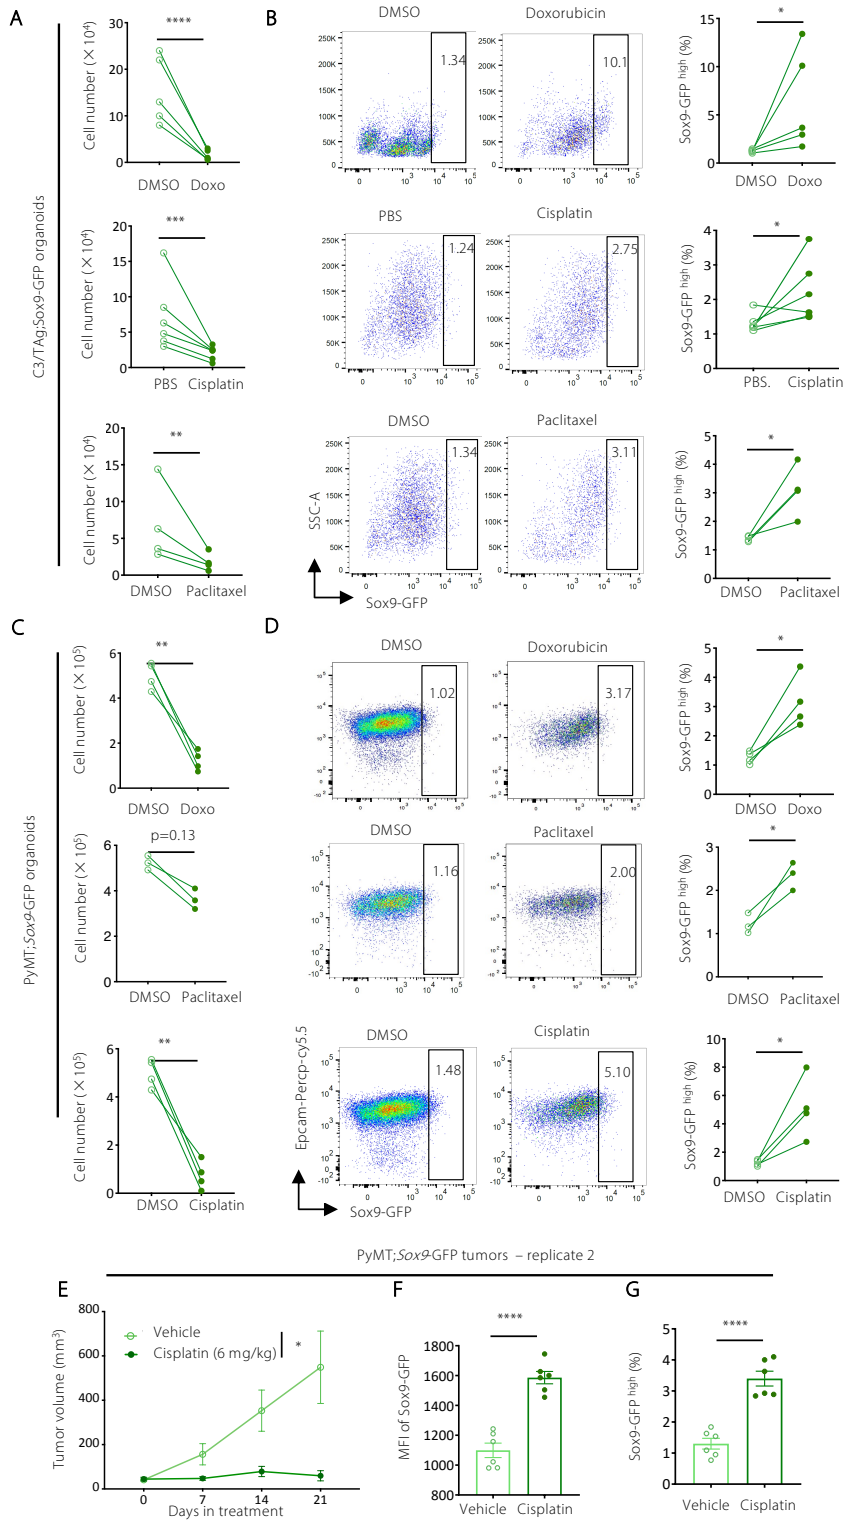

**Fig. S3. SOX9<sup>high</sup> tumor cells are enriched after chemotherapy.**

A. Effect of chemotherapeutic agents on tumor organoid cell numbers. Tumor organoids derived from different C3/TA<sub>g</sub>;Sox9-GFP tumors ( $n = 4-6$ ) were treated with vehicle or various drugs (1  $\mu$ M Doxorubicin (DOXO), 2  $\mu$ M Cisplatin, or 5 nM Paclitaxel) for 3 days.

B. Flow cytometry measuring Sox9-GFP levels in tumor organoids as treated in (A). Top 1-2% of Sox9-GFP-expressing cells in the vehicle-treated group of the individual tumor were defined as the SOX9<sup>high</sup> cells. The gating strategies for the chemotherapy treatment groups were based on their matching vehicle control of the same organoid line. The percentage of Sox9-GFP<sup>high</sup> cells was quantified.

C. Effect of chemotherapeutic drugs on PyMT;Sox9-GFP tumor organoid growth. Tumor organoids derived from different tumors ( $n = 3-4$ ) were treated with vehicle or chemotherapeutic drugs (1  $\mu$ M Doxorubicin (Doxo), 5 nM Paclitaxel, or 2  $\mu$ M Cisplatin) for 3 days.

D. Flow cytometry measuring Sox9-GFP levels in tumor organoids as treated in (C). Top 1-2% of Sox9-GFP-expressing cells in vehicle treated group of individual tumor lines were defined as the SOX9<sup>high</sup> cells. The gating strategies for the chemotherapy treatment groups were based on their matching vehicle control of the same organoid line. Percentage of Sox9-GFP<sup>high</sup> cells was quantified.

E. Effect of cisplatin on the growth of PyMT;Sox9-GFP tumors (replicate 2). 300,000 freshly isolated tumor cells from a spontaneous PyMT tumor were orthotopically injected into NOD/SCID mice. When tumors grew to approximately 3-5 mm in diameter, mice were treated with 6 mg/kg/week cisplatin or control for 3 weeks (Vehicle:  $n = 6$ ; Cisplatin:  $n = 6$ ).

F. The Sox9-GFP mean fluorescence intensity (MFI) of Lin-DAPI- tumor cells in tumors treated as in (E).

G. The percentage of SOX9<sup>high</sup> cells in tumors treated as in (E).

All data are represented as mean  $\pm$  SEM.  $P$  values were determined by paired two-tailed Student's t-test (A-D), two-way RM ANOVA (E), or unpaired two-tailed Student's t-test (F-G).

\*\*\*\* $p < 0.0001$ ; \*\*\* $p < 0.001$ ; \*\* $p < 0.01$ ; \* $p < 0.05$ .

**Fig. S4**

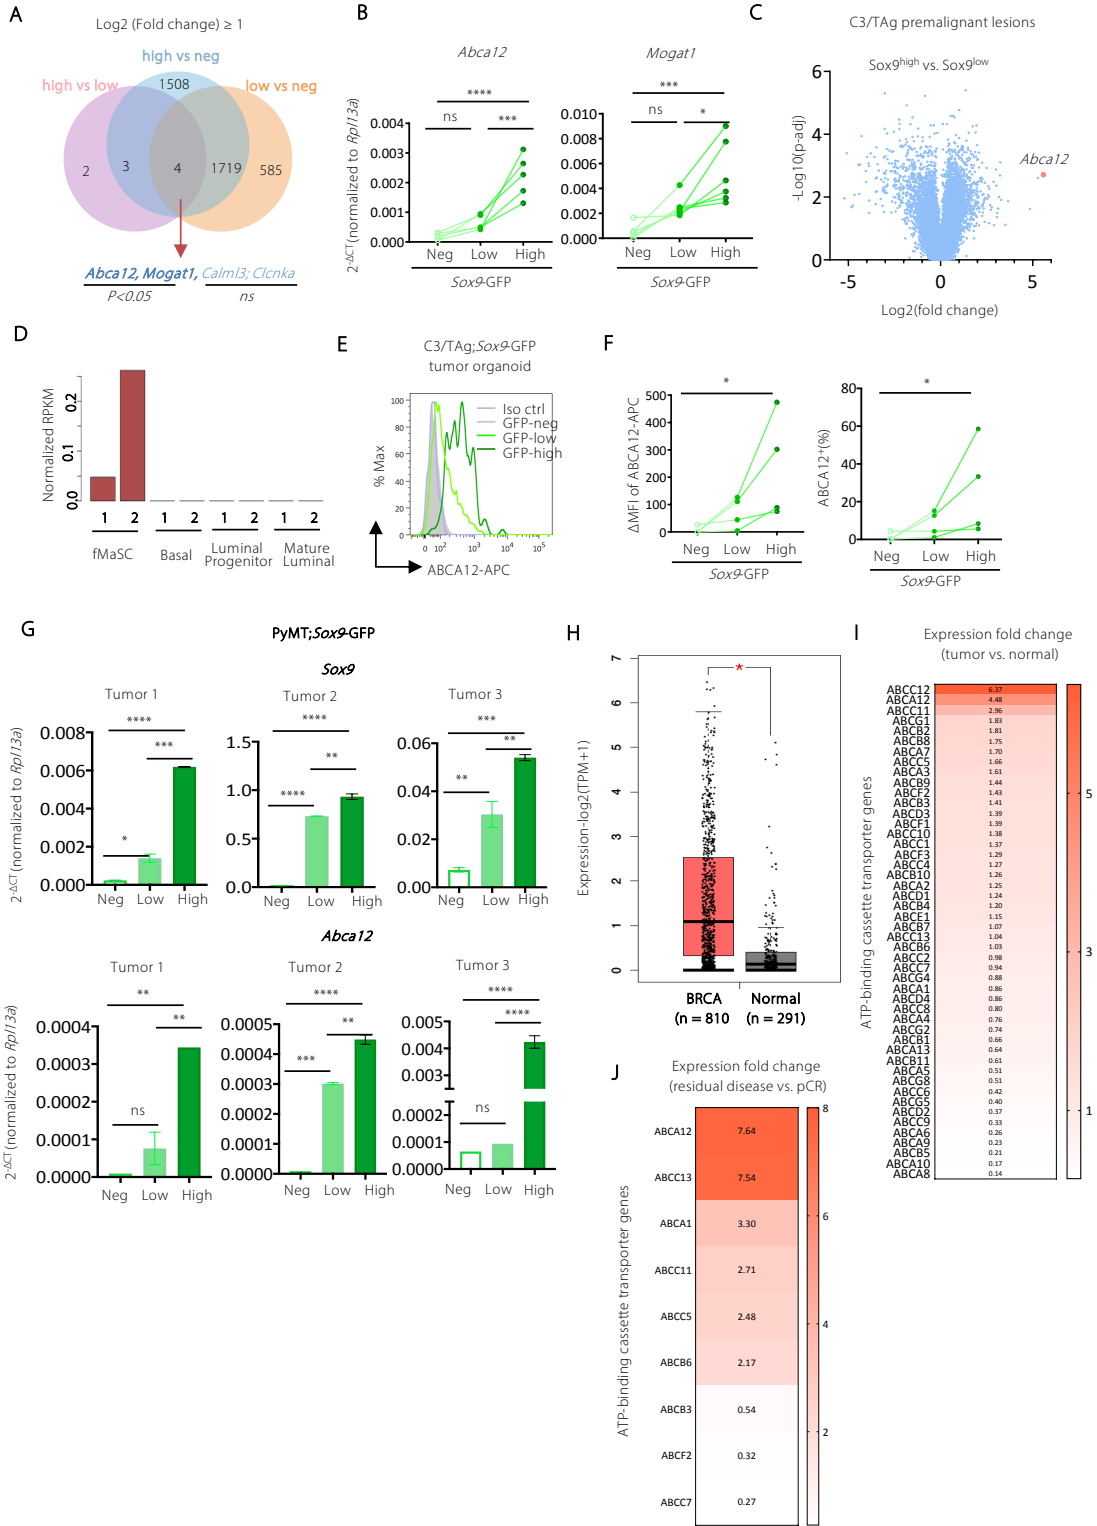

**Fig. S4. SOX9<sup>high</sup> cancer stem cells upregulate the ABCA12 lipid transporter.**

- A. Venn diagram showing overlap of differentially expressed genes (Log<sub>2</sub> (fold change) ≥ 1) between Sox9<sup>neg, low</sup> and <sup>high</sup> C3/TAg tumor cells (*n* = 4 tumors).
- B. qRT-PCR validation of candidate genes (*Abca12* and *Mogat1*) upregulated in SOX9<sup>high</sup> C3/TAg tumor cells (*n* = 5).
- C. Microarray comparing SOX9<sup>low</sup> and <sup>high</sup> cells in C3/TAg premalignant lesions showing *Abca12* as the top upregulated gene in SOX9<sup>high</sup> cells (GSE135892, *n* = 3 mice).
- D. RNA-seq analysis of *Abca12* expression in fetal and adult mammary cell types. The graph was generated using [https://wahl-lab-salk.shinyapps.io/Mammary\\_snATAC/](https://wahl-lab-salk.shinyapps.io/Mammary_snATAC/) (Chung et al., 2019) (35). fMaSC, fetal mammary stem cell.
- E. Flow cytometry measuring ABCA12 expression in SOX9<sup>neg, low</sup> and <sup>high</sup> cells in C3/TAg;Sox9-GFP tumor organoids (*n* = 4).
- F. Quantification of ABCA12 mean fluoresce intensity (MFI) and ABCA12<sup>+</sup> populations in SOX9<sup>neg, low</sup> and <sup>high</sup> cells in C3/TAg;Sox9-GFP tumor organoids by flow cytometry (*n* = 4).
- G. *Sox9* and *Abca12* mRNA levels in sorted Sox9-GFP<sup>neg, low</sup> and <sup>high</sup> PyMT tumor cells as determined by qRT-PCR. Three independent tumors were analyzed.
- H. *ABCA12* expression in breast invasive carcinoma (BRCA) or normal mammary tissue. TPM, transcripts per million. (TCGA and GTEx data were analyzed by GEPIA2).
- I. The expression levels of ATP-binding cassette transporter genes in breast cancer compared to normal tissue. Data were derived from Hlavac et al., 2013 (38).
- J. The expression levels of ATP-binding cassette transporters in tumors that maintained residual disease and tumors that showed pathological complete response (pCR) after neoadjuvant chemotherapy (*n*=19 patients). The patients underwent sequential weekly paclitaxel / FEC (5-fluorouracil, epirubicin and cyclophosphamide) neoadjuvant chemotherapy. Data were extracted from published data in Park et al., 2006 (39).

All data are represented as mean ± SEM. *P* values were determined by one-way ANOVA with Turkey's test (B, G) or Dunn's test (F), or unpaired two-tailed Student's t-test (H). \*\*\*\**p* < 0.0001; \*\*\**p* < 0.001; \*\**p* < 0.01; \**p* < 0.05; ns, not significant.

**Fig. S5**

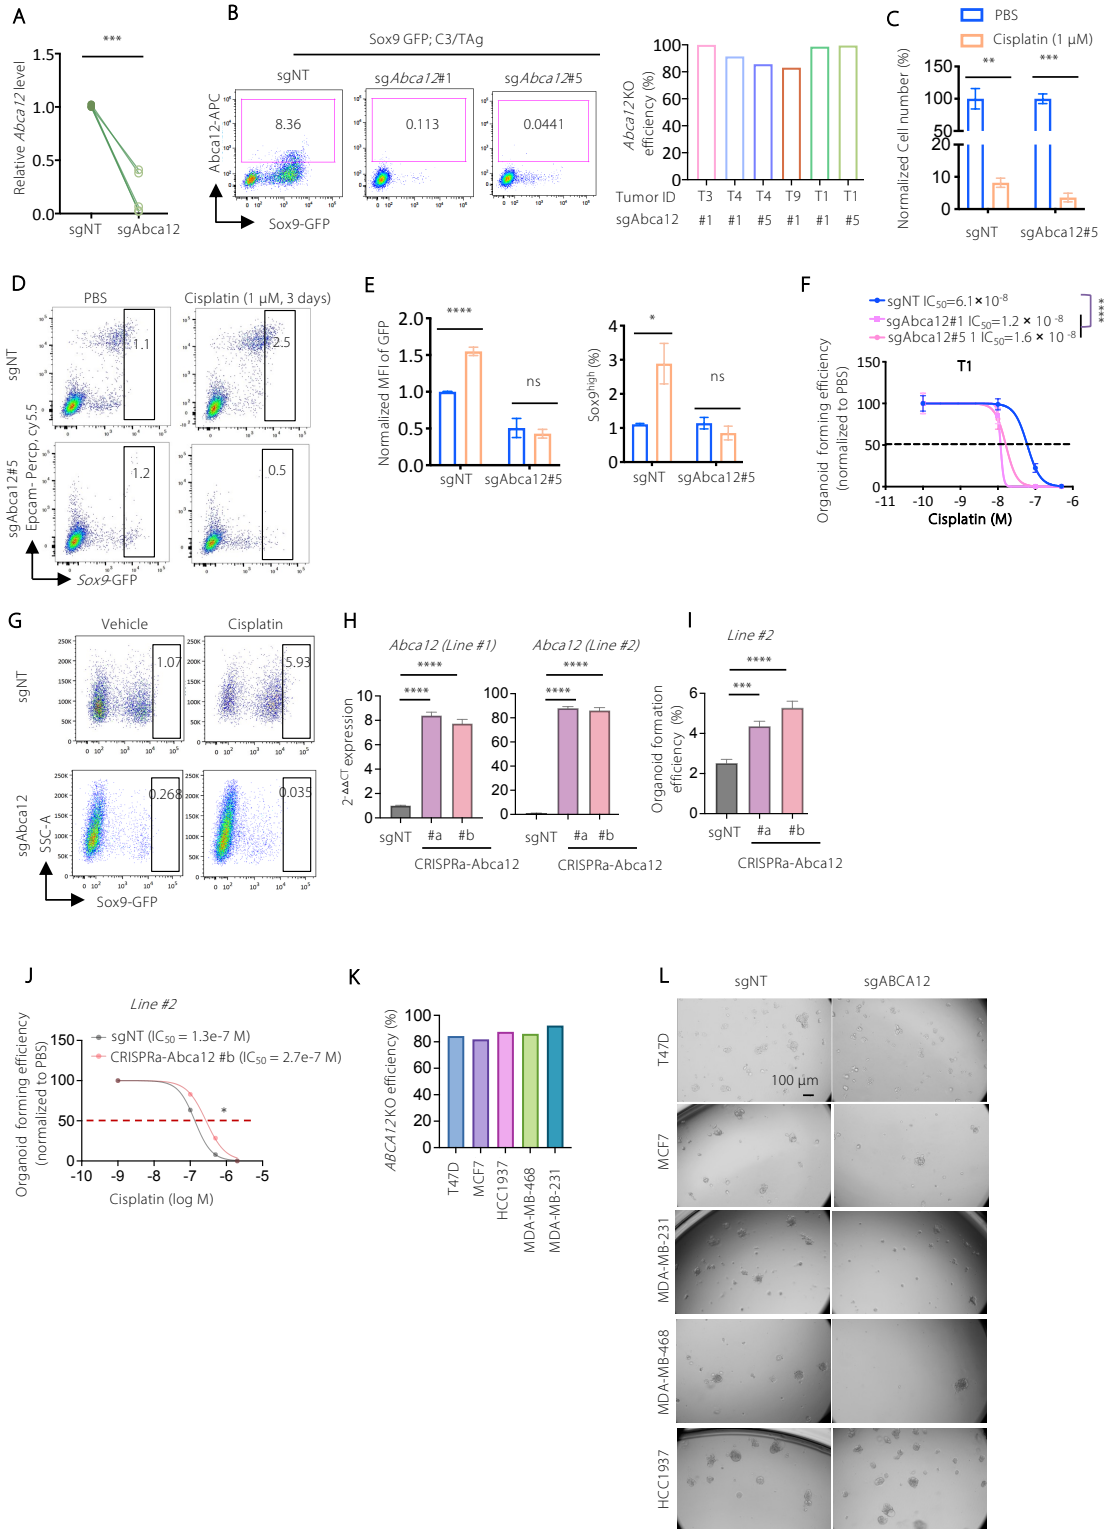



**Fig. S5. Downregulation of *Abca12* impairs cancer stem cell activity and chemoresistance of SOX9<sup>high</sup> cells.**

- A. Expression levels of *Abca12* mRNA in the sgNT or sgAbca12 C3/TAg;Sox9-GFP tumor organoids as determined by qRT-PCR. The significant reduction of *Abca12* mRNA levels was likely due to nonsense-mediated decay caused by frame-shifting indels introduced by CRISPR ( $n = 4$ ).
- B. Flow cytometry measuring ABCA12 deletion efficiency in C3/TAg;Sox9-GFP tumor organoids.
- C. Relative cell numbers of sgNT and sgAbca12 C3/TAg; Sox9-GFP tumor organoids treated with vehicle or 1  $\mu$ M cisplatin for 3 days ( $n = 3$ ).
- D. Flow cytometry measuring Sox9-GFP expression in sgNT and sgAbca12 C3/TAg;Sox9-GFP tumor organoids after being treated with vehicle or cisplatin for 3 days ( $n = 3$ ).
- E. Mean fluorescence intensity (MFI) of Sox9-GFP and percentage of Sox9-GFP<sup>high</sup> cells in sgNT and sgAbca12 C3/TAg;Sox9-GFP tumor organoids after being treated with vehicle or cisplatin for 3 days, as measured in D.
- F. Effect of cisplatin on tumor organoid forming efficiency of sgNT and sgAbca12 C3/TAg;Sox9-GFP cells (organoid line T1). 500 cells were seeded in medium containing different concentrations of cisplatin. Tumor organoids were counted after 5-day culture ( $n = 6$ ).
- G. Flow cytometry measuring Sox9-GFP expression in sgNT and sgAbca12 C3/TAg;Sox9-GFP tumors treated with vehicle or cisplatin for 3 weeks. Lin<sup>-</sup> DAPI<sup>-</sup> cells were gated.
- H. qRT-PCR quantifying the expression of *Abca12* in WT (sgNT) and Abca12 CRISPRa C3/TAg;Sox9-GFP tumor organoids.
- I. Tumor organoid-forming efficiency of WT (sgNT) and Abca12 overexpression (CRISPRa-Abca12) C3/TAg;Sox9-GFP tumor cells (Line 2).
- J. Effect of cisplatin on tumor organoid formation by WT (sgNT) and Abca12 overexpression (CRISPRa-*Abca12* #b) C3/TAg;Sox9-GFP tumor organoids ( $n = 5$ , Line 2).
- K. *ABCA12* deletion efficiency in human breast cancer cell lines measured by TIDE assay.
- L. Representative images of tumor organoids formed by sgNT and sgABCA12-transduced breast cancer cell lines. 2,000 cells were seeded in organoid culture medium and tumor organoids were counted after 6-7 days.

All data are represented as mean  $\pm$  SEM. *P* values were determined by paired (A) or unpaired two-tailed Student's t-test (C and E), one-way ANOVA with Dunnett's multiple comparisons test (H-I), Ordinary two-way ANOVA (F and J). \*\*\*\* $p < 0.0001$ ; \*\*\* $p < 0.001$ ; \*\* $p < 0.01$ ; \* $p < 0.05$ ; ns, not significant.

**Fig. S6**

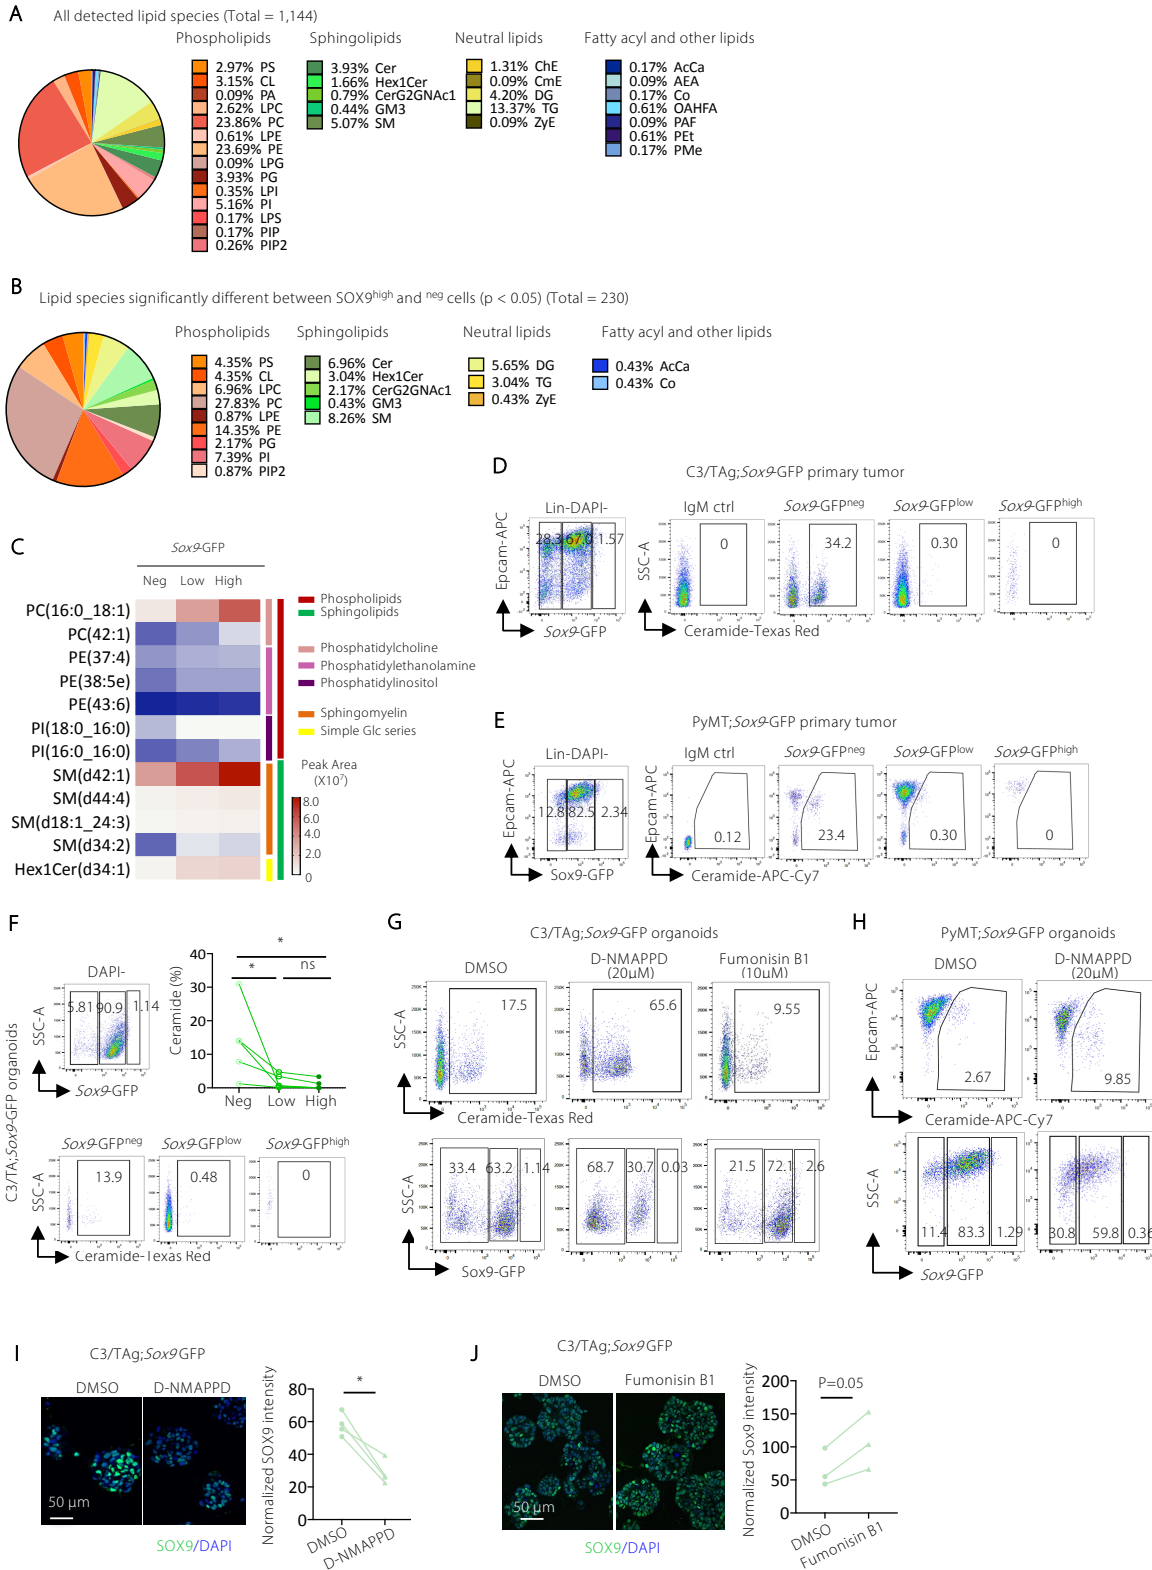

**Fig. S6. Lipidomic analyses uncovered that ABCA12 promotes SOX9 expression and cancer stemness by reducing ceramide abundance.**

- A. Lipid species identified by lipidomics profiling of SOX9<sup>neg, low</sup> and <sup>high</sup> tumor cells sorted from C3/TAg;Sox9-GFP tumors ( $n = 5$ ).
- B. The significantly altered lipid species between SOX9<sup>high</sup> and SOX9<sup>neg</sup> cells ( $p < 0.05$ ).
- C. Lipid species upregulated in SOX9<sup>high</sup> cells compared to SOX9<sup>neg/low</sup> cells ( $p < 0.05$ , SOX9<sup>high</sup> vs. SOX9<sup>neg</sup>).
- D. Flow cytometry measuring the levels of ceramide in Sox9<sup>neg, low</sup> and <sup>high</sup> C3/TAg primary tumor cells.
- E. Flow cytometry measuring the levels of ceramide in Sox9<sup>neg, low</sup> and <sup>high</sup> PyMT primary tumor cells.
- F. Flow cytometry measuring the levels of ceramide in C3/TAg tumor organoids.
- G. Sox9-GFP and ceramide levels in C3/TAg tumor organoids treated with DMSO, D-NMAPPD (20 $\mu$ M) or Fumonisin B1 (10  $\mu$ M) for 5 days, as measured by flow cytometry.
- H. Sox9-GFP expression and ceramide levels in PyMT tumor organoids treated with DMSO or D-NMAPPD (10  $\mu$ M) for 5 days, as measured by flow cytometry.
- I. Representative immunofluorescence of SOX9 protein in C3/TAg tumor organoids treated with DMSO or D-NMAPPD (20  $\mu$ M) for 3 days. Organoids were cultured without the drug for 2 days, and then treated for 3 days ( $n = 4$ ).
- J. Representative immunofluorescence of SOX9 protein in C3/TAg tumor organoids treated with DMSO or Fumonisin B1 (10  $\mu$ M) for 5 days.

All data are represented as mean  $\pm$  SEM.  $P$  values were determined by one-way ANOVA with Holm-Šídák's multiple comparisons test (F) or paired two-tailed Student's  $t$ -test (I-J). \* $p < 0.05$ ; ns, not significant.

**Fig. S7**

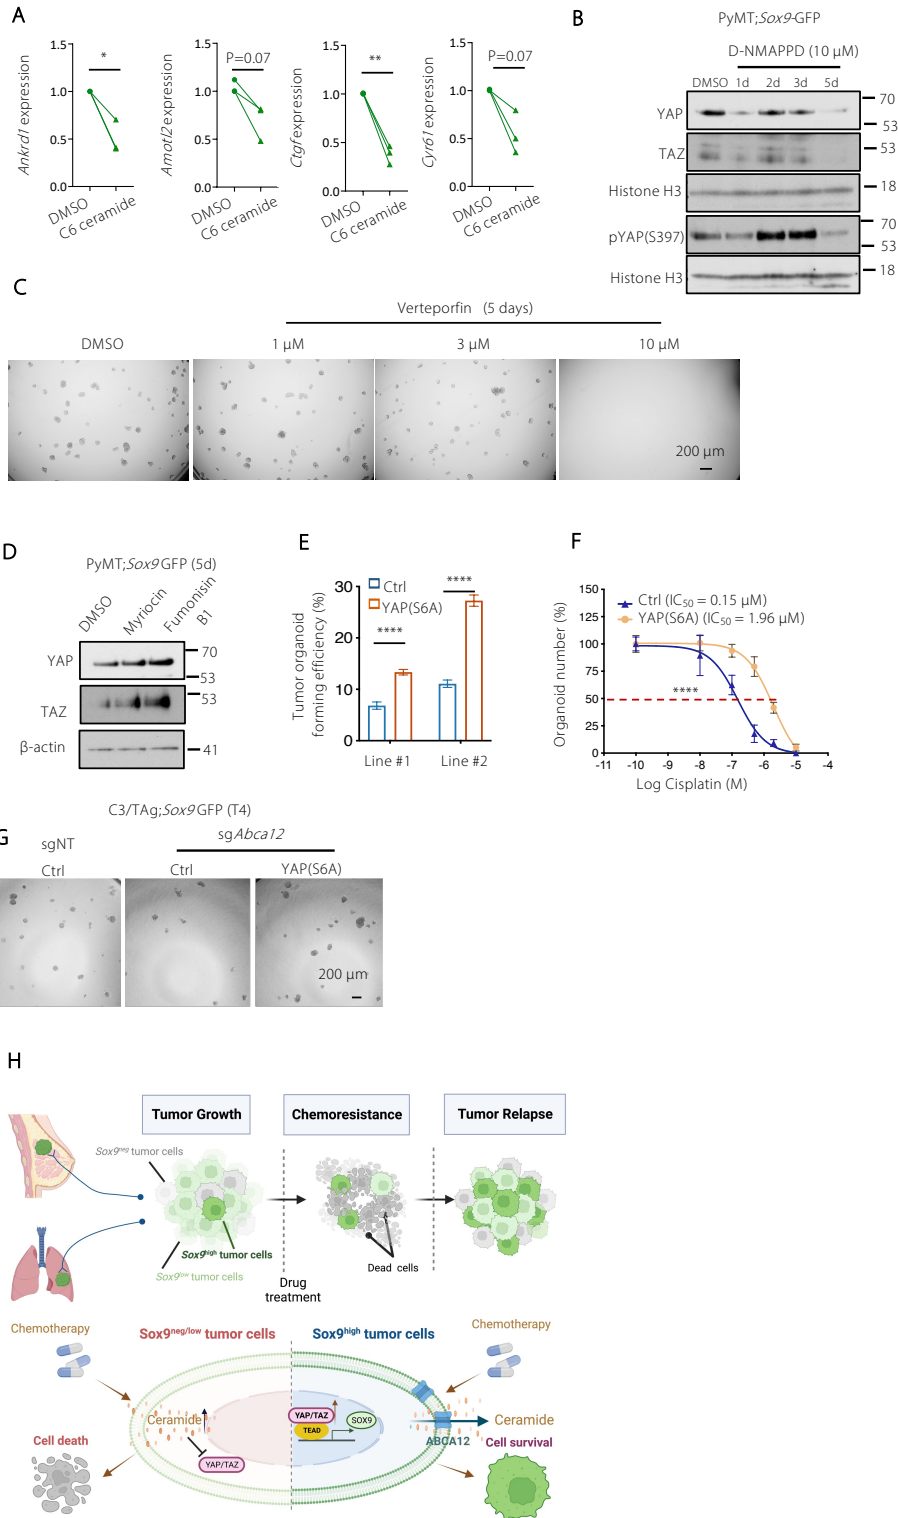

**Fig. S7: Ceramide suppressed SOX9 expression via inhibition of the YAP/TAZ pathway.**

- A. qRT-PCR quantifying the expression of the indicated genes in C3/TAg tumor organoids after treatment with DMSO or C6-ceramide (10  $\mu$ M) for 3 days ( $n = 3$ ).
- B. Western blot showing the effect of D-NMAPPD (10  $\mu$ M) on YAP, pYAP(S397), and TAZ levels in PyMT tumor organoids (two independent experiments were performed).
- C. Effect of verteporfin (1, 3, 10  $\mu$ M) on organoid forming efficiency of C3/TAg tumor cells ( $n = 3$ ).
- D. Western blot showing the effect of Myriocin (2  $\mu$ M) or Fumonisin B1 (10  $\mu$ M) on YAP and TAZ levels in PyMT tumor organoids ( $n = 2$ ).
- E. Effect of YAP activation (YAP1 (S6A)) on organoid forming efficiency of C3/TAg tumor cells. Two tumor lines are used.
- F. Effect of cisplatin on organoid forming efficiency of control and YAP1 (S6A)-expressing C3/TAg tumor cells. Cells were treated with vehicle or cisplatin for 5 days. The relative numbers of organoids were normalized to the vehicle control.
- G. Effect of YAP1 (S6A) expression on organoid forming efficiency by sgNT1 and sg*Abca12* C3/TAg tumor cells.
- H. A proposed model of the impact of the ABCA12-ceramide-YAP/TAZ-SOX9 axis on tumor heterogeneity and drug resistance (generated by BioRender).

All data are represented as mean  $\pm$  SEM. *P* values were determined by paired (A) or unpaired (E) two-tailed Student's t-test, or two-way ANOVA (F). \*\*\*\**p* < 0.0001; \*\**p* < 0.01; \**p* < 0.05.

**Table S1.**

|               | Forward                    | Reverse                |
|---------------|----------------------------|------------------------|
| <i>Rpl13a</i> | CCTGCTGCTCTCAAGGTTGTT      | TGGTTGTCACTGCCTGGTACTT |
| <i>SV40</i>   | CCAATTATGTCACACCAC<br>AGA  | TTGCTGTCGTTACTGAGGATG  |
| <i>EGFP</i>   | CTACCCCGACCACATGAA         | TCTTGTAGTTGCCGTCGTCC   |
| <i>Abca12</i> | TCCTGGTGTGGAAAAATTGGC      | GTGCGAGGTAACAAGTTGGTT  |
| <i>Sox9</i>   | AGGAAGCTGGCAGACCAGTA       | CGTTCTTCACCGACTTCCTC   |
| <i>Mogat1</i> | TGGTGCCAGTTTGGTTCCAG       | TGCTCTGAGGTCGGGTTCA    |
| <i>Cyr61</i>  | CTGCGCTAAACAACCTCAA        | GCAGATCCCTTTCAGAGCGC   |
| <i>Ankrd1</i> | GCTGGTAACAGGCAAAAAGA<br>AC | CCTCTCGCAGTTTCTCGCT    |
| <i>Amotl2</i> | GGAGAAGAGTTGCCACCTAT       | TCGAAGAGCTTCATCCTGTCG  |
| <i>Ctgf</i>   | GGGCCTCTTCTGCGATTC         | ATCCAGGCAAGTGCATTGGTA  |

**Table S1. qRT-PCR primers**

# Data S1: Supplementary information: western blot scans

Fig. 1B: Sox9

Fig. 1B: Histone H3

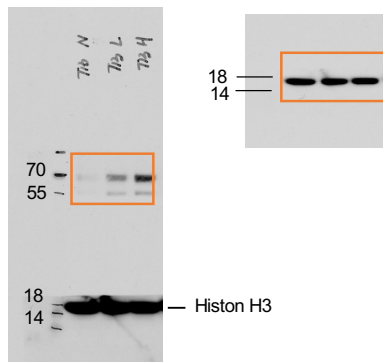

Western blot scanned films. Boxes indicate lanes shown in the figures.

## Supplementary information: western blot scans

Fig. 5J: Sox9

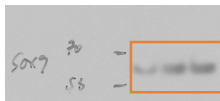

Fig. 5J:  $\beta$ -actin

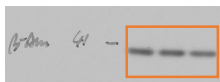



# Supplementary information: western blot scans

Fig. 7C:

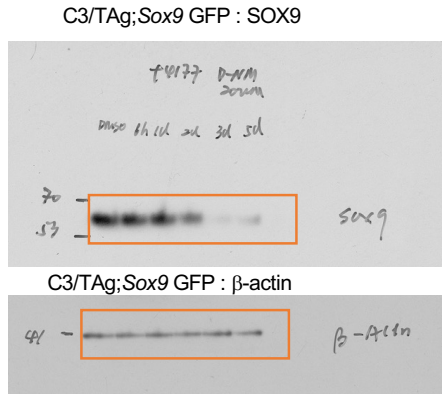

Fig. 7C:

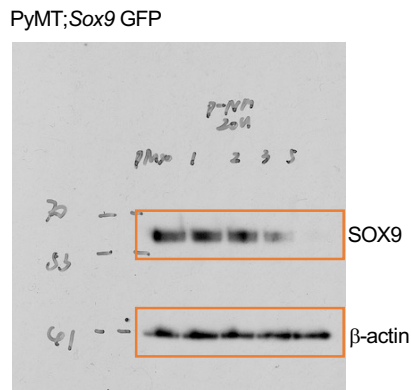

Fig. 7E:

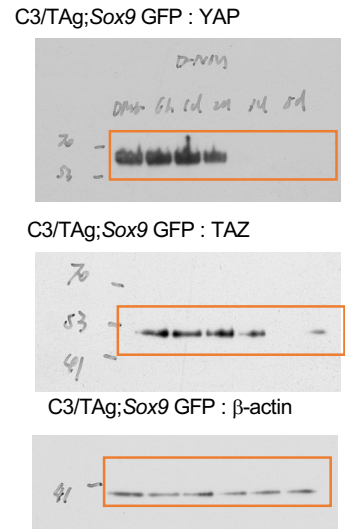

Fig. 7H:

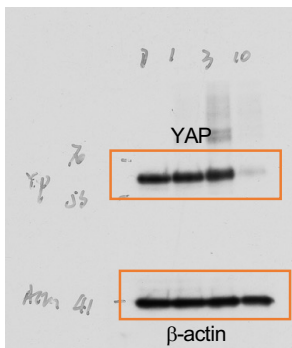

Fig. 7K:

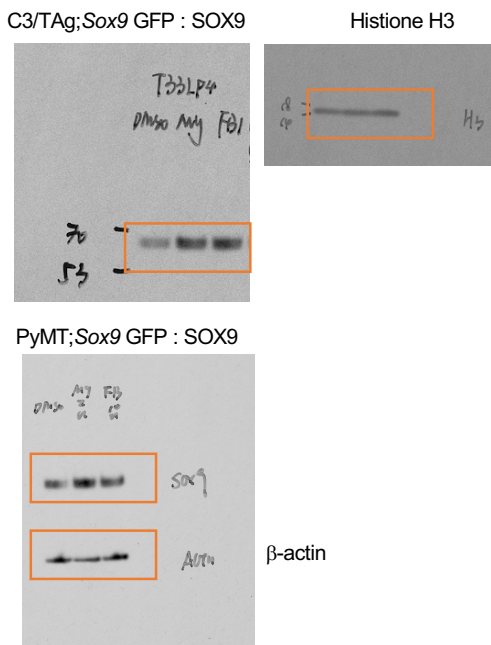

Fig. 7N:

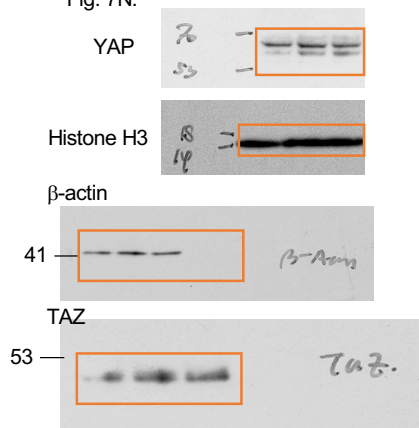

Fig. 7O:

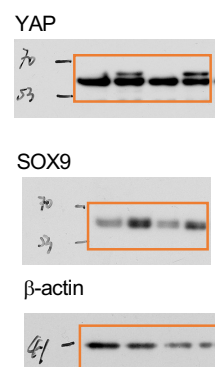

Fig. 7P:

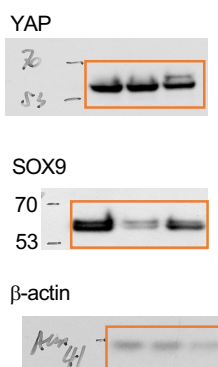

Western blot scanned films. Boxes indicate lanes shown in the figures.

## Supplementary information: western blot scans

Fig. S7B:

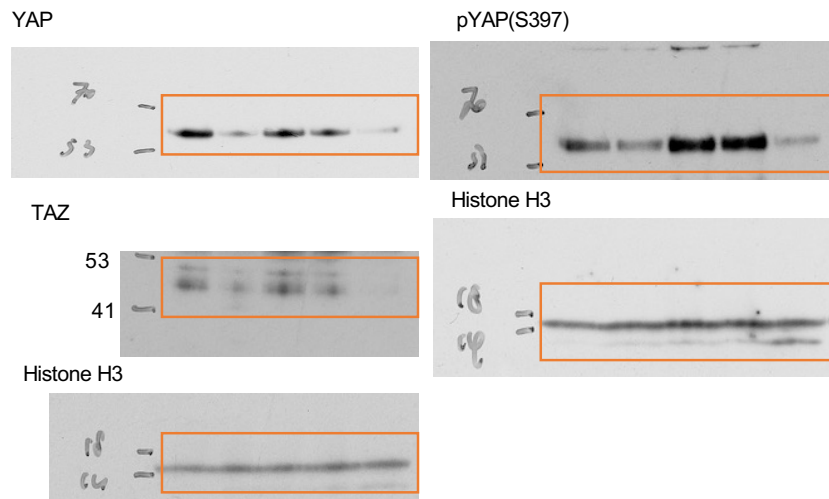

Fig. S7D:

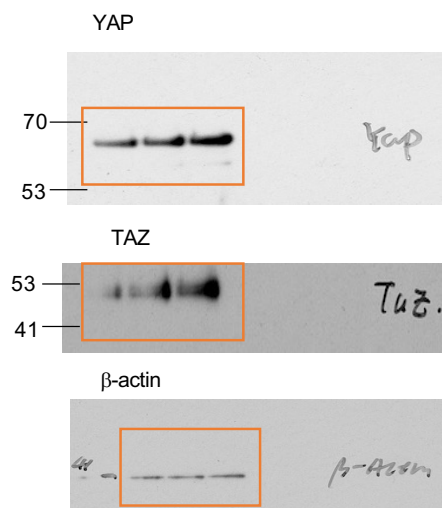

Western blot scanned films. Boxes indicate lanes shown in the figures.

**Data S2: KEY RESOURCES TABLE**

| <b>REAGENT or RESOURCE</b>                                                    | <b>SOURCE</b>                        | <b>IDENTIFIER</b> |
|-------------------------------------------------------------------------------|--------------------------------------|-------------------|
| <b>Antibodies</b>                                                             |                                      |                   |
| Biotin anti-mouse TER-119                                                     | BioLegend                            | Cat#116204        |
| Biotin anti-mouse CD45                                                        | BioLegend                            | Cat#103104        |
| Biotin anti-mouse CD31                                                        | BioLegend                            | Cat#102404        |
| APC anti-mouse CD326 (Ep-CAM)                                                 | BioLegend                            | Cat#118214        |
| PerCP/Cy5.5 anti-mouse CD326 (Ep-CAM)                                         | BioLegend                            | Cat#118220        |
| Streptavidin V450                                                             | BD Biosciences                       | Cat#560797        |
| Goat-anti-ABCA12                                                              | Novus Biologicals                    | Cat#NB100-93466   |
| Rabbit anti-human ABCA12                                                      | Sigma Aldrich                        | Cat#HPA043194     |
| Mouse anti-ceramide                                                           | Sigma-Aldrich                        | Cat#C8104         |
| Rabbit anti-Yap                                                               | Cell Signaling Technology            | Cat#14074S        |
| Rat anti-Keratin 8                                                            | Developmental Studies Hybridoma Bank | Cat#TROMA-I       |
| Rabbit anti-Keratin 14                                                        | BioLegend                            | Cat#905304        |
| Chicken anti-Keratin 14                                                       | BioLegend                            | Cat#906004        |
| Rabbit anti-Phospho-YAP (Ser397)                                              | Cell Signaling Technology            | Cat#13619S        |
| Rabbit anti-Taz                                                               | Cell Signaling Technology            | Cat#72804S        |
| Mouse anti- $\beta$ -actin                                                    | BD Biosciences                       | Cat#612656        |
| Mouse anti-Histone H3                                                         | Cell Signaling Technology            | Cat#14269S        |
| Rabbit anti-V5-Tag (D3H8Q)                                                    | Cell Signaling Technology            | Cat#13202S        |
| Goat IgG Isotype Control                                                      | Novus Biologicals                    | Cat#NB410-28088   |
| Goat anti-Chicken IgY (H+L) Secondary Antibody, Alexa Fluor 488               | Invitrogen                           | Cat#A-11039       |
| Goat anti Chicken IgY (H+L) Secondary Antibody, Alexa Fluor 633               | Invitrogen                           | Cat#A-21103       |
| Alexa Fluor 488-AffiniPure Goat Anti-Rabbit IgG (H+L)                         | Jackson ImmunoResearch               | Cat#111-545-003   |
| Goat anti-Rabbit IgG (H+L) Cross-Adsorbed Secondary Antibody, Alexa Fluor 568 | Invitrogen                           | Cat#A-11011       |
| Alexa Fluor 647-conjugated AffiniPure Goat Anti-Rabbit IgG (H+L)              | Jackson ImmunoResearch               | Cat#111-605-144   |
| Alexa Fluor 488-AffiniPure Goat Anti-Rat IgG (H+L)                            | Jackson ImmunoResearch               | Cat#112-545-143   |
| Alexa Fluor 647-AffiniPure Goat Anti-Rat IgG (H+L)                            | Jackson ImmunoResearch               | 112-605-143       |
| Goat anti-Rat IgG (H+L) Secondary Antibody, Alexa Fluor® 568 conjugate        | Invitrogen                           | Cat#A-11077       |
| Alexa Fluor 647 donkey anti-goat IgG (H+L)                                    | Invitrogen                           | Cat#A21447        |
| Anti-IgM, k Isotype Ctrl Mouse Monoclonal Antibody                            | BioLegend                            | Cat#401602        |

|                                                                     |                                |                           |
|---------------------------------------------------------------------|--------------------------------|---------------------------|
| Goat anti Mouse IgM Cross Adsorbed Secondary Antibody, DyLight 755  | Invitrogen                     | Cat#SA5-10155             |
| Goat anti-Mouse IgM Cross Adsorbed Secondary Antibody, DyLight 594, | Invitrogen                     | Cat#SA5-10152             |
| ImmPRESS HRP Anti-Rabbit Ig (Peroxidase) Polymer Detection Kit      | Vector Laboratories            | Cat#MP-7401               |
| ImmPRESS HRP Anti-Goat Ig (Peroxidase) Polymer Detection Kit        | Vector Laboratories            | Cat#MP-7405               |
| HRP Donkey anti-rabbit IgG                                          | BioLegend                      | Cat#406401                |
| HRP Goat anti-mouse IgG                                             | BioLegend                      | Cat#405306                |
| <b>Bacterial and virus strains</b>                                  |                                |                           |
| ElectroMAX Stbl4 Competent Cells                                    | Life Technologies              | Cat#1635018               |
| NEB® Stable Competent E. coli (High Efficiency)                     | New England Biolabs            | Cat#C30401                |
| <b>Biological samples</b>                                           |                                |                           |
| Patient-derived xenografts (PDX)                                    | ref. 33                        | N/A                       |
| Mouse tumor tissue                                                  | This paper                     | N/A                       |
| <b>Chemicals, peptides, and recombinant proteins</b>                |                                |                           |
| Advanced DMEM/F12                                                   | Gibco                          | Cat#12634028              |
| DMEM/Hams F-12 50/50 Mix                                            | Corning                        | Cat#10-092-CV             |
| DMEM                                                                | Corning                        | Cat#10-017-CV             |
| Epicult (R) - B Mouse Medium Kit                                    | STEMCELL Technologies          | Cat#05610                 |
| Fetal Bovine Serum                                                  | VWR                            | Cat# 97068-085            |
| HyClone Calf Serum, U.S. origin                                     | Cytiva                         | Cat#SH30073.03            |
| GlutaMAX™ Supplement 100x                                           | Gibco                          | Cat#35050061              |
| Penicillin-streptomycin 100x                                        | Corning                        | Cat# 30-002-CI            |
| PBS, 1X without calcium and magnesium                               | Corning                        | Cat#21-040-CV             |
| Trypan Blue solution, 0.4%                                          | Corning                        | Cat#25900CI               |
| Bovine Serum Albumin, Heat Shock Treated (BSA)                      | Fisher Scientific              | Cat# BP1600100            |
| Poly(2-hydroxyethyl methacrylate)                                   | Sigma-Aldrich                  | Cat#P3932                 |
| Ethanol 200 Proof                                                   | Becon Labs                     | Cat#2701                  |
| Collagenase, Type III                                               | Worthington Biochemical        | Cat# LS004182             |
| Deoxyribonuclease I (DNase I)                                       | Worthington Biochemical; Roche | Cat# LS002139; Cat#104159 |
| Neutral Protease (Dispase)                                          | Worthington Biochemical        | Cat# LS02109              |
| Trypsin 0.05% with 0.53 mM EDTA                                     | Corning                        | Cat# 25-052-CI            |
| Epidermal Growth Factor human (EGF)                                 | Sigma-Aldrich                  | Cat#E9644                 |
| Fibroblast Growth Factor basic Protein, Human recombinant (FGF2)    | Millpore-Sigma                 | Cat#GF003                 |
| Heparin sodium salt, from porcine intestinal mucosa                 | Millpore-Sigma                 | Cat#H3149                 |
| Y-27632 (hydrochloride), ROCK inhibitor                             | Cayman Chemical Company        | Cat#10005583              |

|                                                   |                                 |                 |
|---------------------------------------------------|---------------------------------|-----------------|
| Hyaluronidase                                     | Worthington<br>Biochemical      | Cat# LS002592   |
| Matrigel Basement Membrane Matrix                 | Corning                         | Cat#354234      |
| Dimethylsulfoxide (DMSO)                          | Millipore-Sigma                 | Cat#MX-1458     |
| Red blood cell lysing buffer                      | Sigma-Aldrich                   | Cat#R7757       |
| Agarose, Low Melting Point                        | Promega                         | Cat#V2111       |
| 32% Paraformaldehyde (formaldehyde) aqueous       | Electron<br>Microscopy Sciences | Cat#15714S      |
| Xylene                                            | Fisher Chemical                 | Cat# BPX3P1GAL  |
| DAPI Fluoromount-G mounting medium                | Southernbiotech                 | Cat#0100-20     |
| Antigen Unmasking Solution, Citric Acid Based     | Vector<br>Laboratories          | Cat#H3300       |
| Retriever for Antigen Unmasking                   | Electron<br>Microscopy Sciences | Cat#62700-10    |
| UltraPure™ 0.5M EDTA, pH 8.0                      | ThermoFisher                    | Cat#15575020    |
| Halt™ Protease Inhibitor Cocktails                | Fisher Scientific               | Cat#PI87786     |
| Fisher Chemical™ Permout™ Mounting Medium         | Fisher Scientific               | Cat#SP15100     |
| Methanol                                          | EMD Millipore                   | Cat#MX0488-1    |
| 30% Hydrogen Peroxide                             | Sigma-Aldrich                   | Cat#31642       |
| Lenti-X Concentrator                              | Clontech<br>Laboratories        | Cat#631232      |
| Polybrene                                         | EMD Millipore                   | Cat#TR-1003-G   |
| Blasticidin S HCl                                 | Corning                         | Cat#MT30100RB   |
| Puromycin dihydrochloride                         | Tocris                          | Cat#4089        |
| DAPI                                              | Sigma-Aldrich                   | Cat# D8417      |
| C6-ceramide                                       | Cayman Chemical<br>Company      | Cat#62525       |
| D-NMAPPD                                          | Cayman Chemical<br>Company      | Cat#10006305    |
| Myriocin                                          | Cayman Chemical<br>Company      | Cat#63150       |
| D-NMAPPD; ≥98% (HPLC) ( <i>In vivo</i> treatment) | Sigma-Aldrich                   | Cat#SML2358     |
| Fumonisin B1                                      | Cayman Chemical<br>Company      | Cat#62580       |
| Cisplatin                                         | Cayman Chemical<br>Company      | Cat#13119       |
| Doxorubicin                                       | LC Laboratories                 | Cat#D-4000      |
| Paclitaxel                                        | LC Laboratories                 | Cat#P-9600      |
| Kolliphor EL                                      | Sigma-Aldrich                   | Cat#C5135       |
| BLUEstain™ Protein ladder                         | Goldbio                         | Cat#P007-3000   |
| Rat-tail collagen I                               | Corning                         | Cat#354236      |
| Tris-HCl Buffer 1M, pH 7.5, Sterile               | Bioworld                        | Cat# 42020268-3 |
| Sodium Chloride                                   | Fisher Scientific               | Cat# BP358212   |
| Sodium deoxycholate                               | Sigma-Aldrich                   | Cat# 30970      |
| Sodium Dodecyl Sulfate                            | Fisher Scientific               | Cat#BP-166      |
| Nonidet P-40 Substitute                           | IBI Scientific                  | Cat#IB01140     |
| 10% Formalin                                      | Fisher Scientific               | Cat#SF98-4      |
| NuPAGE® LDS Sample Buffer (4X)                    | Invitrogen                      | Cat#NP0007      |

|                                                                |                             |                 |
|----------------------------------------------------------------|-----------------------------|-----------------|
| NuPAGE® MOPS SDS Running Buffer (for Bis-Tris Gels only) (20X) | Invitrogen                  | Cat#NP0001      |
| NuPAGE® Transfer Buffer (20X)                                  | Invitrogen                  | Cat#NP00061     |
| Fisher Healthcare Tissue-Plus OCT Compound                     | Fisher Scientific (FS)      | Cat#23730571    |
| Carnation Instant Nonfat Dry Milk                              | Amazon                      | Cat#B07NQDB3XS  |
| Carbenicillin (Disodium)                                       | Goldbio                     | Cat#C-103-5     |
| MEM Non-Essential Amino Acids Solution 100mM (100X)            | Invitrogen                  | Cat#11140-050   |
| MEM Sodium Pyruvate Solution 100mM (100X)                      | Invitrogen                  | Cat#11360-070   |
| Western Blot Stripping buffer                                  | Thermo Fisher Scientific    | Cat#46430       |
| Scal-HF - 5,000 units                                          | New England Biolabs         | Cat#R3122L      |
| Esp3I (BsmBI)                                                  | New England Biolabs         | Cat#R0734S      |
| T4 DNA Ligase                                                  | New England Biolabs         | Cat#M0202S      |
| BamHI-HF® Restriction Enzyme, 20,000 units/ml, 10,000 units    | New England Biolabs         | Cat#R3136S      |
| Jetprime transfection reagent                                  | VWR                         | Cat#89129-924   |
| BSA fraction V                                                 | Fisher Scientific           | Cat#BP1600100   |
| Isopropanol                                                    | Fisher Scientific           | Cat#BP26184     |
| 2-Mercaptoethanol                                              | Sigma-Aldrich               | Cat#M314825ML   |
| Tween 20, molecular biology grade                              | Sigma-Aldrich               | Cat#P9416       |
| Triton-X100                                                    | Sigma-Aldrich               | Cat#X100        |
| <b>Critical commercial assays</b>                              |                             |                 |
| Western Lightning ECL Pro                                      | PerkinElmer Health Sciences | Cat#NEL121001EA |
| DAB Peroxidase (HRP) Substrate Kit, 3,3'-diaminobenzidine      | Vector Laboratories         | Cat#SK-4100     |
| High-Capacity cDNA Reverse Transcription Kit                   | Applied Biosystems          | Cat#4368814     |
| Power SYBR® Green PCR Master Mix                               | Applied Biosystems          | Cat#4368708     |
| PrimeSTAR MAX DNA polymerase                                   | Takara Bio                  | Cat#R045A       |
| NEBuilder® HiFi DNA Assembly Master Mix                        | New England Biolabs         | Cat#E2621S      |
| Qubit® RNA HS Assay Kit                                        | Thermo Fisher Scientific    | Cat#Q32852      |
| Dura Chemiluminescent Substrate                                | Fisher Scientific           | Cat#PIA34075    |
| Quick-RNA Purification Kit, Microprep                          | Zymo Research               | Cat#R1050       |
| RNeasy Plus Micro Kit                                          | Qiagen                      | Cat#74034       |
| Direct-zol™ RNA MiniPrep                                       | Zymo Research               | Cat#R2072       |
| NEBNext Ultra II Directional library prep kit                  | New England Biolabs         | Cat#E7765       |
| NucleoSpin® Gel and PCR Clean-Up                               | Takara                      | Cat#740609      |
| ZymoPURE II Plasmid Maxiprep Kit                               | Zymo Research               | Cat#D4203       |
| Zyppy™ Plasmid Miniprep Kit                                    | Zymo Research               | Cat#D4020       |

|                                                                                                              |                           |                   |
|--------------------------------------------------------------------------------------------------------------|---------------------------|-------------------|
| NEB 10-beta/Stable Outgrowth Medium                                                                          | New England Biolabs (NEB) | Cat#B9035S        |
| Quick Ligation Kit                                                                                           | New England Biolabs (NEB) | Cat#M2200S        |
| SapphireAmp® Fast PCR Master Mix                                                                             | Clontech                  | Cat#RR350B        |
| <b>Experimental models: Cell lines</b>                                                                       |                           |                   |
| HEK293T                                                                                                      | ATCC                      | CVCL_0063         |
| Tumor organoid                                                                                               | This paper                | N/A               |
| <b>Experimental models: Organisms/strains</b>                                                                |                           |                   |
| Mouse: FVB-Tg(C3-1-TAg)cJeg/JegJ; FVB.J.B6(Cg)Tg(Sox9-EGFP)EB209Gsat/Mmucd                                   | ref. 26                   | N/A               |
| Mouse: Sox9-GFP; RFP; MMTV-PyMT                                                                              | This paper                | N/A               |
| Mouse: CAG::mRFP1                                                                                            | The Jackson Laboratory    | Cat #005884       |
| Mouse FVB/N-Tg(MMTV-PyVT)634Mul/J                                                                            | The Jackson Laboratory    | Cat #002374       |
| Mouse: NOD/SICD                                                                                              | The Jackson Laboratory    | Cat #001303       |
| Mouse: NSG                                                                                                   | The Jackson Laboratory    | Cat #005557       |
| <b>Oligonucleotides</b>                                                                                      |                           |                   |
| Primers for RT-PCR are found in the RT-PCR primers table                                                     | This paper                | NA                |
| Primers for cloning are found in the Method details                                                          | This paper                | NA                |
| Primers for C3/TAg genotyping:<br>5'- CAG AGC AGA ATT GTG GAG TGG;<br>5'-GGA CAA ACC ACA ACT AGA ATG CAG TG  | This paper                | NA                |
| Primers for PyMT genotyping:<br>5'- GGA AGC AAG TAC TTC ACA AGG G<br>5'- GGA AAG TCA CTA GGA GCA GGG         | This paper                | NA                |
| Primer for genotyping internal control:<br>5'- CAA ATG TTG CTT GTC TGG TG;<br>5'- GTC AGT CGA GTG CAC AGT TT | This paper                | NA                |
| <b>Recombinant DNA</b>                                                                                       |                           |                   |
| pLVX-Puro                                                                                                    | Takara                    | Cat#632164        |
| pLVX-Puro-SOX9                                                                                               | This paper                | N/A               |
| pMD2.G                                                                                                       | Addgene                   | Cat#Addgene_12259 |
| pCMVR8.74                                                                                                    | Addgene                   | Cat#Addgene_22036 |
| LentiCRISPRv2 puro                                                                                           | Addgene                   | Cat#Addgene_98290 |
| LentiCRISPRv2 puro-sgNT                                                                                      | This paper                | N/A               |
| LentiCRISPRv2 puro-sgAbca12 (mouse)                                                                          | This paper                | N/A               |
| LentiCRISPRv2 puro-sgABCA12 (human)                                                                          | This paper                | N/A               |
| Lenti-EF1a-dCas9-VPR-Puro                                                                                    | Addgene                   | Cat#Addgene_99373 |

|                                                             |                                                                                                |                                                                                                                                                                                                                             |
|-------------------------------------------------------------|------------------------------------------------------------------------------------------------|-----------------------------------------------------------------------------------------------------------------------------------------------------------------------------------------------------------------------------|
| pLKO5.sgNT.EFS.tRFP                                         | This paper                                                                                     | N/A                                                                                                                                                                                                                         |
| pLKO5.sgAbca12.EFS.tRFP                                     | This paper                                                                                     | N/A                                                                                                                                                                                                                         |
| pLX304                                                      | Addgene                                                                                        | Cat#Addgene_25890                                                                                                                                                                                                           |
| pLX304-YAP1(S6A)-V5                                         | Addgene                                                                                        | Cat#Addgene_42562                                                                                                                                                                                                           |
| <b>Software and algorithms</b>                              |                                                                                                |                                                                                                                                                                                                                             |
| Image J                                                     | National Institutes of Health and the Laboratory for Optical and Computational Instrumentation | <a href="https://imagej.nih.gov/ij/">https://imagej.nih.gov/ij/</a>                                                                                                                                                         |
| QuPath                                                      | The university of Edinburgh                                                                    | <a href="https://qupath.github.io/">https://qupath.github.io/</a>                                                                                                                                                           |
| GSEA4.0.2                                                   | NCI                                                                                            | <a href="https://www.gsea-msigdb.org/gsea/index.jsp">https://www.gsea-msigdb.org/gsea/index.jsp</a>                                                                                                                         |
| Slide Book software 6.0                                     | 3i-intelligent imaging                                                                         | <a href="https://www.intelligent-imaging.com/slidebook">https://www.intelligent-imaging.com/slidebook</a>                                                                                                                   |
| CaseViewer                                                  | 3D HISTECH                                                                                     | <a href="https://www.3dhitech.com/solutions/caseviewer/">https://www.3dhitech.com/solutions/caseviewer/</a>                                                                                                                 |
| Graphpad Prism 8 and 9                                      | Graphpad                                                                                       | <a href="https://www.graphpad.com/">https://www.graphpad.com/</a>                                                                                                                                                           |
| Hisat2                                                      | ref. 68                                                                                        | <a href="http://daehwankimlab.github.io/hisat2/">http://daehwankimlab.github.io/hisat2/</a>                                                                                                                                 |
| Stringtie                                                   | ref. 69                                                                                        | <a href="http://ccb.jhu.edu/software/stringtie/index.shtml?t=manual">http://ccb.jhu.edu/software/stringtie/index.shtml?t=manual</a>                                                                                         |
| FastQC (version 0.64)                                       | Babraham Bioinformatics                                                                        | <a href="https://www.bioinformatics.babraham.ac.uk/projects/fastqc/">https://www.bioinformatics.babraham.ac.uk/projects/fastqc/</a>                                                                                         |
| DeSeq2 (1.34.0)                                             | ref. 70                                                                                        | <a href="http://bioconductor.org/packages/DESeq2/">http://bioconductor.org/packages/DESeq2/</a>                                                                                                                             |
| Galaxy                                                      | Galaxy                                                                                         | <a href="https://usegalaxy.org/">https://usegalaxy.org/</a>                                                                                                                                                                 |
| BD FACSDiva 6.1                                             | BD Biosciences                                                                                 | Cat#643629                                                                                                                                                                                                                  |
| FlowJo 9.3.2 and 10.4.0                                     | FlowJo, LLC                                                                                    | <a href="https://www.flowjo.com/solutions/flowjo/downloads/">https://www.flowjo.com/solutions/flowjo/downloads/</a>                                                                                                         |
| Gen5 (Biotek)                                               | Agilent                                                                                        | <a href="https://www.biotek.com/products/software-robotics-software/gen5-microplate-reader-and-imager-software/">https://www.biotek.com/products/software-robotics-software/gen5-microplate-reader-and-imager-software/</a> |
| QuantStudio 6 Real-Time PCR Software                        | Applied Biosystem                                                                              | <a href="https://www.thermofisher.com/us/en/home/global/forms/life-science/quantstudio-6-7-flex-software.html">https://www.thermofisher.com/us/en/home/global/forms/life-science/quantstudio-6-7-flex-software.html</a>     |
| LIPEA                                                       | Biomedical Cybernetics Group.                                                                  | <a href="https://lipea.biotec.tu-dresden.de/home">https://lipea.biotec.tu-dresden.de/home</a>                                                                                                                               |
| <b>Other</b>                                                |                                                                                                |                                                                                                                                                                                                                             |
| 24-well Transwell cell                                      | Greiner Bio-One                                                                                | 662638                                                                                                                                                                                                                      |
| Nunc® Lab-Tek™ II Chamber Slide                             | Thermo Scientific                                                                              | 154534PK                                                                                                                                                                                                                    |
| Super Pap Pen                                               | Electron Microscopy Sciences                                                                   | 71312                                                                                                                                                                                                                       |
| Cell Scrapers                                               | Biologix Research Company                                                                      | 70-1180                                                                                                                                                                                                                     |
| 1mm electroporation Cuvettes                                | Thermo Fisher Scientific                                                                       | FB101                                                                                                                                                                                                                       |
| NuPAGE™ Novex™ 4-12% Bis-Tris Protein Gels, 1.0 mm, 12-well | Thermo Fisher                                                                                  | NP0322BOX                                                                                                                                                                                                                   |
| FILM, HYBLOT, HGH SENSITIVITY 5x7"                          | Thomas Scientific                                                                              | 1156P38                                                                                                                                                                                                                     |
| Millipore* Immobilon* PVDF Transfer Membranes               | Thermo Fisher Scientific                                                                       | IPVH00010                                                                                                                                                                                                                   |
| 0.22 µm pore size sterile syringe filter                    | Foxx Life Sciences                                                                             | Cat# 371-2215-OEM                                                                                                                                                                                                           |
| Cell strainer, 40 µm                                        | Fisher Scientific                                                                              | Cat# 22-363-547                                                                                                                                                                                                             |



|                                                                                |        |               |
|--------------------------------------------------------------------------------|--------|---------------|
| Whatman Puradisc 25 mm<br>Polyethersulfone Syringe Filter, 0.45<br>µm, sterile | Cytiva | Cat#6780-2504 |
|--------------------------------------------------------------------------------|--------|---------------|

**Data S3. (separate file)**

Source Data
